# Supplementary material for: Repeated Low High-Density Lipoprotein Cholesterol and the Risk of Thyroid Cancer: A Nationwide Population- Based Study in Korea
Source: PubMed Central journal article supplement — Endocrinol Metab (Seoul). 2022 Apr 6;37(2):303–11. doi: 10.3803/EnM.2021.1332 (PMC9081313; doi:10.3803/enm.2021.1332), 2022-04-06
Supplement: enm-2021-1332-suppl1.pdf [file enm-2021-1332-suppl1.pdf]

**Supplemental Table S1.** Low High-Density Lipoprotein Cholesterol Levels and the Risk of Thyroid Cancer

| Group | Total no. | Patients no. | IR per 1,000 | HR <sup>a</sup> (95% CI) |
|-------|-----------|--------------|--------------|--------------------------|
| 0     | 1,815,102 | 7,991        | 0.708        | 1 (reference)            |
| 1     | 531,043   | 2,901        | 0.880        | 1.127 (1.079–1.176)      |
| 2     | 311,858   | 1,924        | 0.995        | 1.225 (1.165–1.289)      |
| 3     | 236,543   | 1,545        | 1.053        | 1.253 (1.185–1.326)      |
| 4     | 239,732   | 1,768        | 1.190        | 1.404 (1.328–1.484)      |

IR, incidence rate; HR, hazard ratio; CI, confidence interval.

<sup>a</sup>HR is calculated by adjusting age, sex, smoking, drinking, regular exercise, income status, body mass index, high blood pressure, dyslipidemia, diabetes.
